# Supplementary material
Source: publisher site journal article supplement (http://e-cmh.org/upload/media/cmh-2023-0485-Supplementary-Fig-1.pdf)

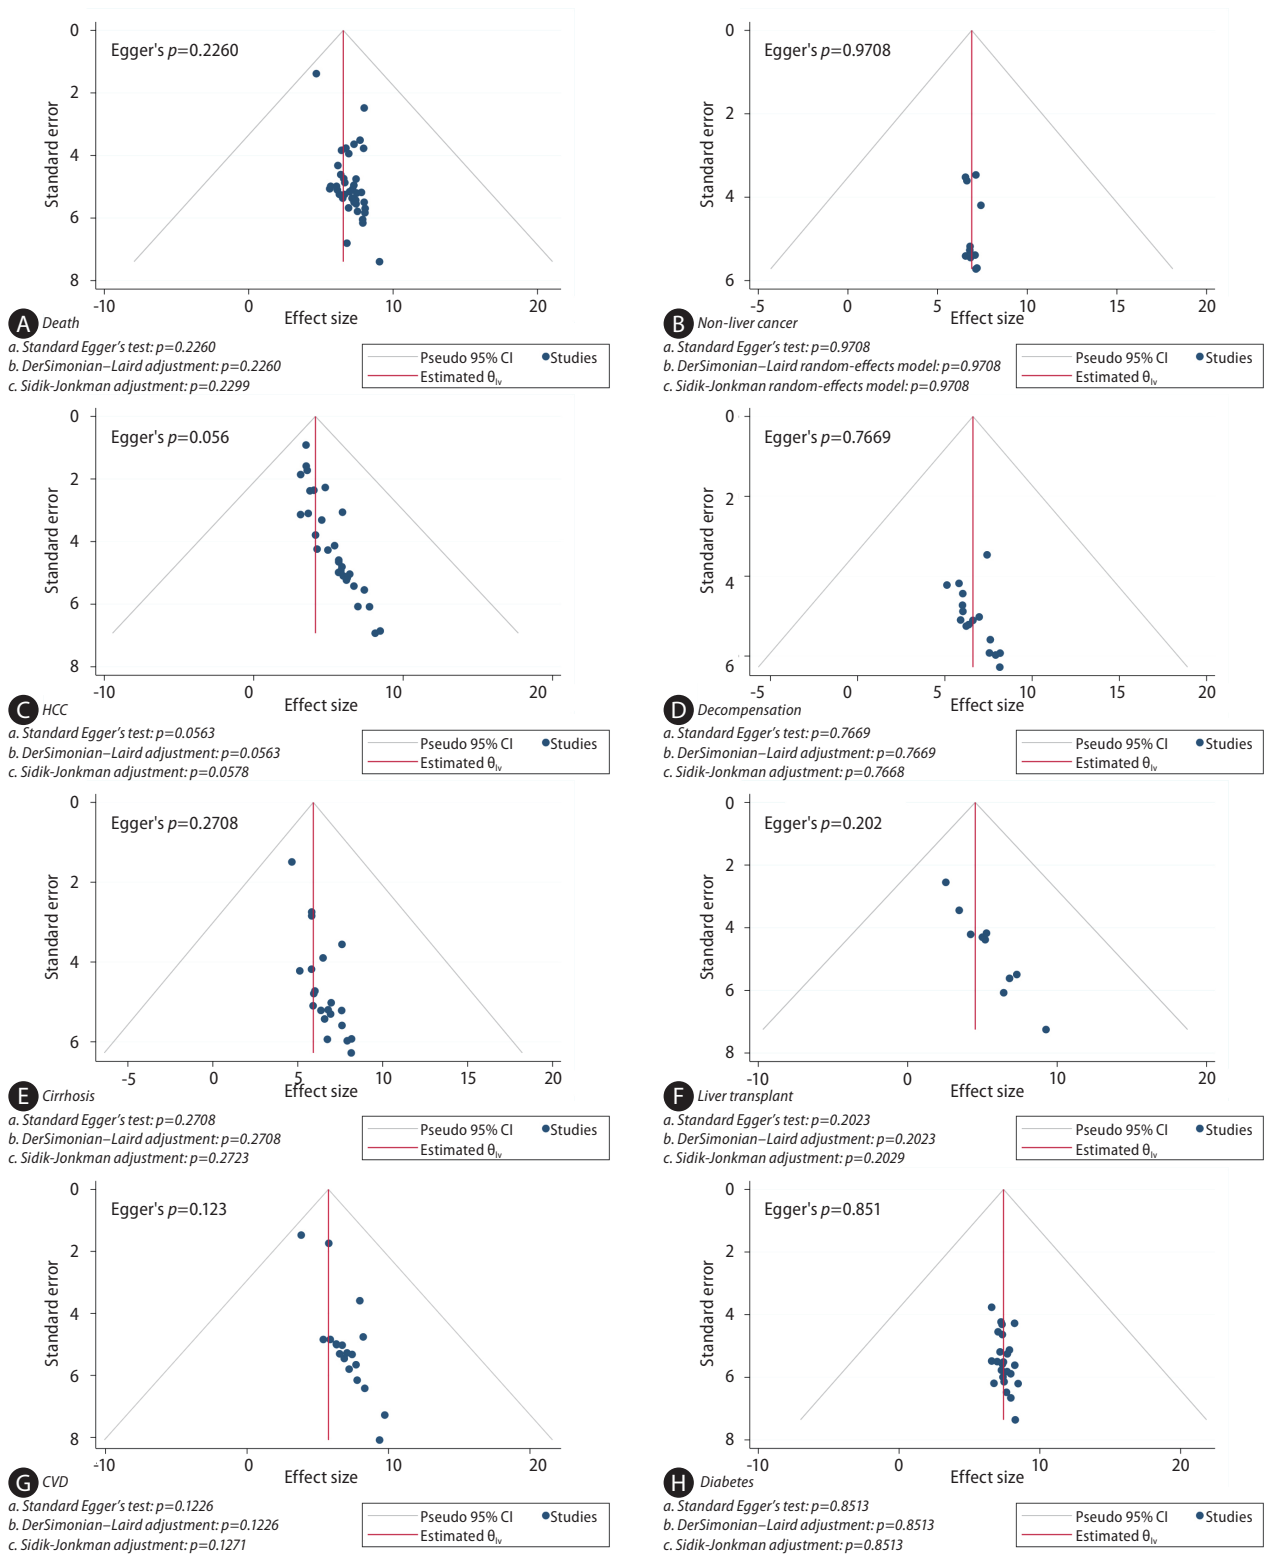

**Supplementary Figure 1.** Funnel plots.

Supplement: Supplementary file 1 [file cmh-2023-0485-Supplementary-Fig-1.pdf]
